# Supplementary material for: Facile synthesis of nitrogen-doped carbon materials with hierarchical porous structures for high-performance supercapacitors in both acidic and alkaline electrolytes
Source: Royal Society of Chemistry journal article supplement (doi:10.1039/c9ta00890j), 2019-01-01
Supplement: c9ta00890j1.pdf [file c9ta00890j1.pdf]

## Supplementary information

### Facile Synthesis of Nitrogen-Doped Carbon Materials with Hierarchical Porous Structures for High-Performance Supercapacitors in Both Acid and Alkaline Electrolyte

Yuntong Li, Ling Liu, Yuzhe Wu, Tong Wu, Haiyang Wu, Qipeng Cai, Yiting Xu, Birong Zeng, Conghui Yuan\* and Lizong Dai\*

Fujian Provincial Key Laboratory of Fire Retardant Materials, College of Materials, Xiamen University, Xiamen, 361005, China.

E-mail: \*yuanch@xmu.edu.cn, \*lzdai@xmu.edu.cn

#### 1. Characterization

<sup>1</sup>H magnetic resonance (NMR) spectrum of the 2,4,6-Tris(4-aminophenyl)-1,3,5-triazine (TAA) was carried out on a Bruker Advanced II AV500 MHz NMR spectrometer. Fourier transform infrared spectroscopy (FT-IR) spectra was measured from a Nicolet Avatar 360. Scanning electron microscopy (SEM) images were taken using a Su-70 instrument. The X-ray photoelectron spectroscopy (XPS) spectra were tested on a PHI Quantum-2000 photoelectron spectrometer (Al K $\alpha$  with 1486.6 eV). Electrochemical impedance spectroscopies (EIS) were carried out with the frequency of 10<sup>-2</sup> to 10<sup>5</sup> Hz and at an amplitude of 5 mV.

#### 2. Synthesis

##### Synthesis of TAA

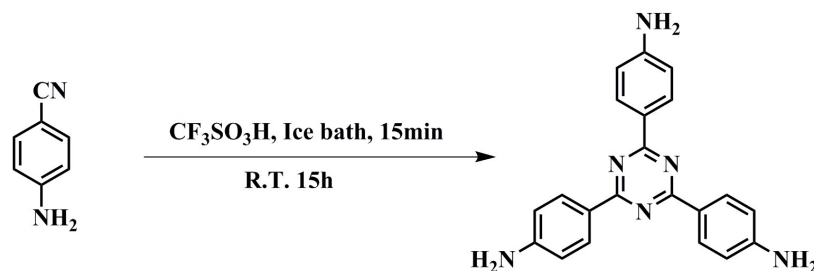

The synthesis of 2,4,6-tris(4-aminophenyl)-1,3,5-triazine (**TAA**) was performed according to previous literature procedure with a minor modification.<sup>33</sup> The detailed synthetic procedure and corresponding NMR are listed as follows:

0.708 g of 4-aminobenzonitrile (6 mmol) was added to 1 mL of trifluoromethane sulfonic acid in 10 mL round-bottom flask and stirred for 15 min at 0 °C by ice-bath. Then, the above mixed solution was further stirred for 15 h at room temperature. Subsequently,  $\text{NH}_3 \cdot \text{H}_2\text{O}$  was added dropwise to the above solution to adjust pH value to 7. Finally, the resulting mixture was centrifuged for 3 times with large amount of deionized water and a yellow solid was obtained. [NMR]  $^1\text{H}$  NMR ( $\text{DMSO-d}_6$ , 500 MHz)  $\delta$  = 5.91 (s, 6H), 6.68 (d, 6H), 8.34 (d, 6H).

#### Synthesis of Aa-NCas

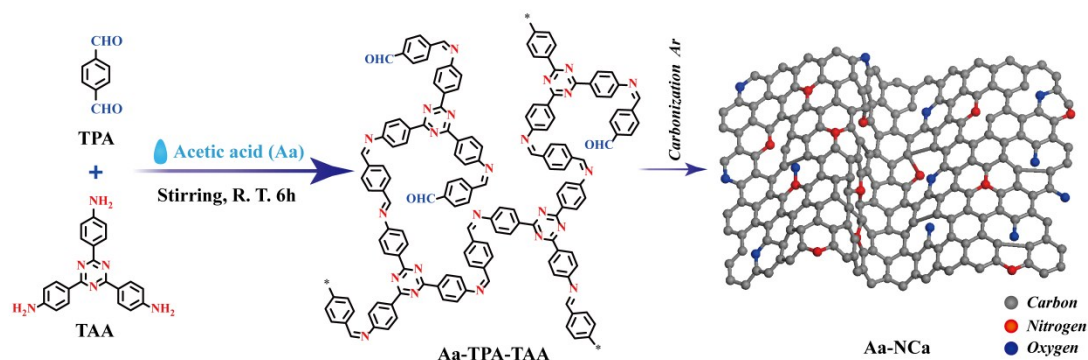

**Scheme S1.** Synthetic procedure of Aa-TPA-TAA and Aa-NCa by using acetic acid as catalyst.

Typically, 0.709 g of TAA (2 mmol) and 0.40 g of TPA (3 mmol) were taken in a 50 mL round bottom flask and dissolved in 10 mL of 1,3,5-trimethylbenzene, 1,4-dioxane mixed solvent ( $v : v = 1 : 4$ ). To this solution, 1 mL of acetic acid (Aa) was added, and stirred at room temperature for 6 h. The reaction mixture was then centrifuged, washed with ethanol for 3 times to remove unreacted monomers, thus affording solid powder. After drying in vacuum, the as-prepared precursor (Aa-TPA-TAA) was carbonized at 850 °C for 2 h with a heating rate of 5 °C  $\text{min}^{-1}$  under Ar atmosphere to prepare Aa-NCa<sub>850</sub>.

## Synthesis of Ta-NCBs

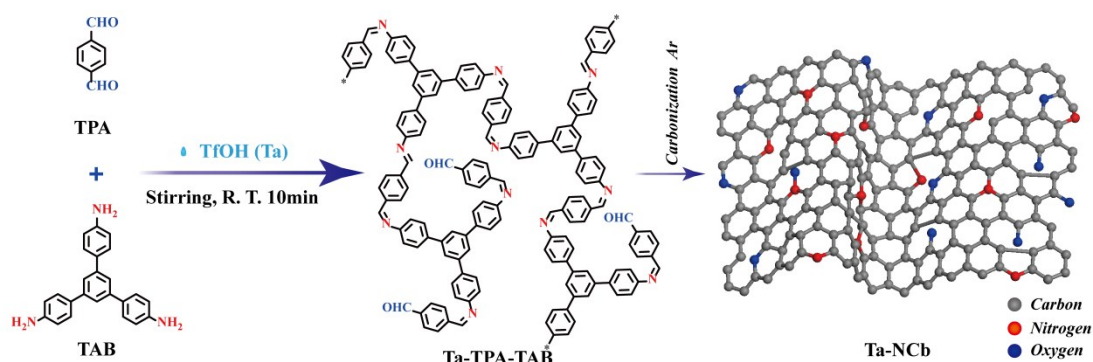

Scheme S2. Synthetic procedure of Ta-TPA-TAB and Ta-NCb by using TfOH as catalyst.

Typically, 0.702 g of 1,3,5-tris(4-aminophenyl)benzene (TAB) (2 mmol) and 0.40 g of TPA (3 mmol) were taken in a 50 mL round bottom flask and dissolved in 10 mL of 1,3,5-trimethylbenzene, 1,4-dioxane mixed solvent ( $v : v = 1 : 4$ ). To this solution, 20  $\mu\text{L}$  of trifluoromethanesulfonic acid was added, and precipitate was generated immediately. The reaction mixture was further stirred at room temperature for 10 min and then centrifuged, washed with ethanol for 3 times to remove unreacted monomers and afford solid powder. After drying in vacuum, the as-prepared precursor Ta-TPA-TAB was carbonized at 850  $^{\circ}\text{C}$  for 2 h with a heating rate of 5  $^{\circ}\text{C min}^{-1}$  under Ar atmosphere to prepare Ta-NCb<sub>850</sub>.

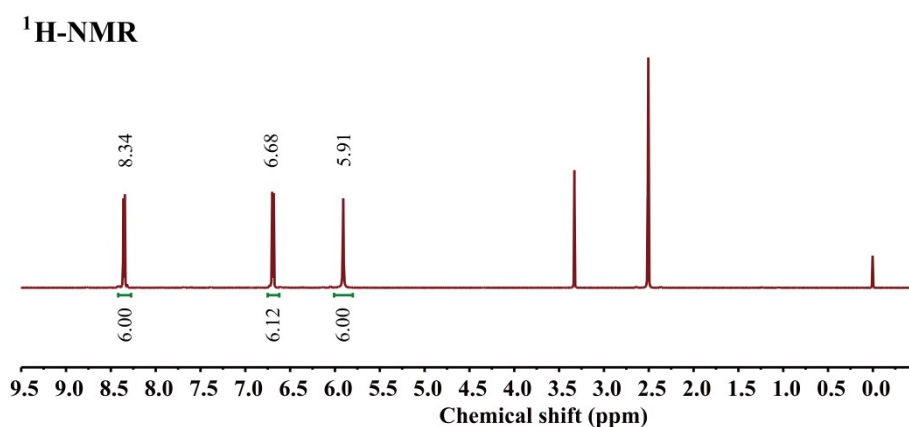

Fig. S1  $^1\text{H}$  spectrum of the TAA.

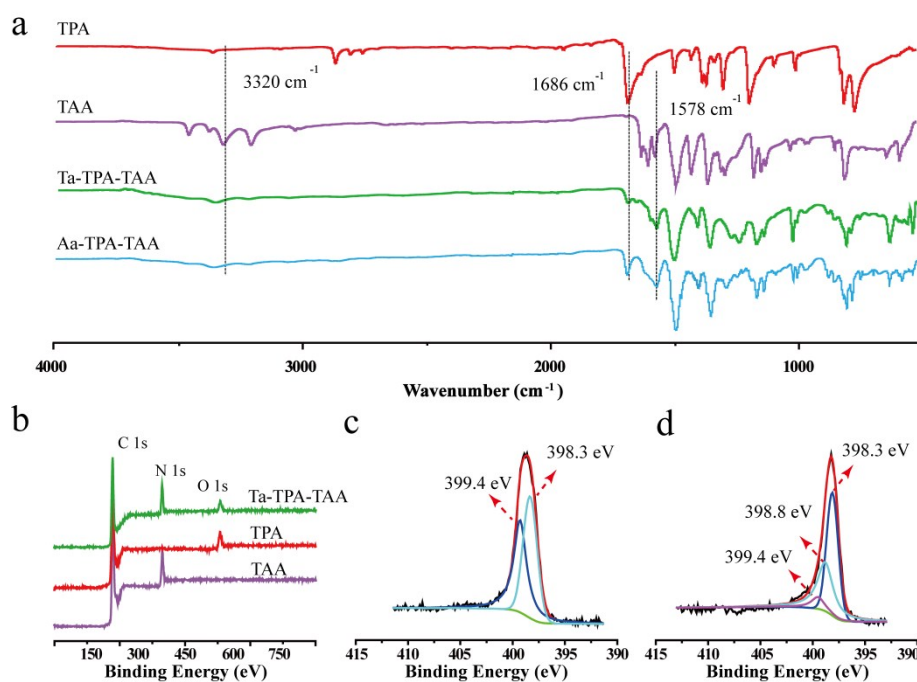

**Fig. S2** FT-IR spectra of TPA, TAA, Ta-TPA-TAA and Aa-TPA-TAA (a); XPS survey spectra of TPA, TAA and Ta-TPA-TAA (b); High-resolution N 1s XPS spectra of TAA (c) and Ta-TPA-TAA (d).

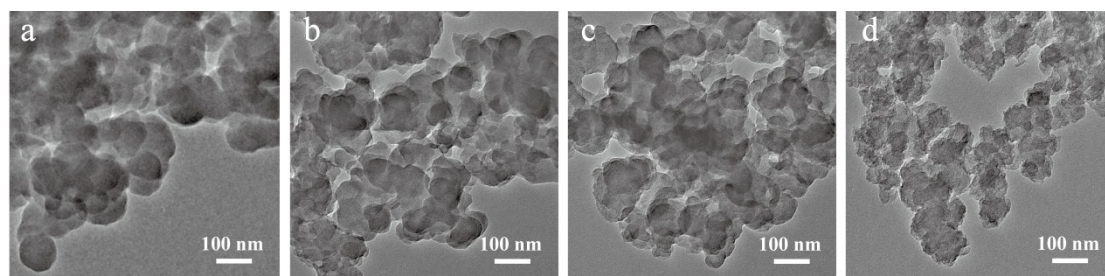

**Fig. S3** TEM images of precursor Ta-TPA-TAA (a), Ta-NCa<sub>650</sub> (b), Ta-NCa<sub>750</sub> (c) and Ta-NCa<sub>950</sub> (d).

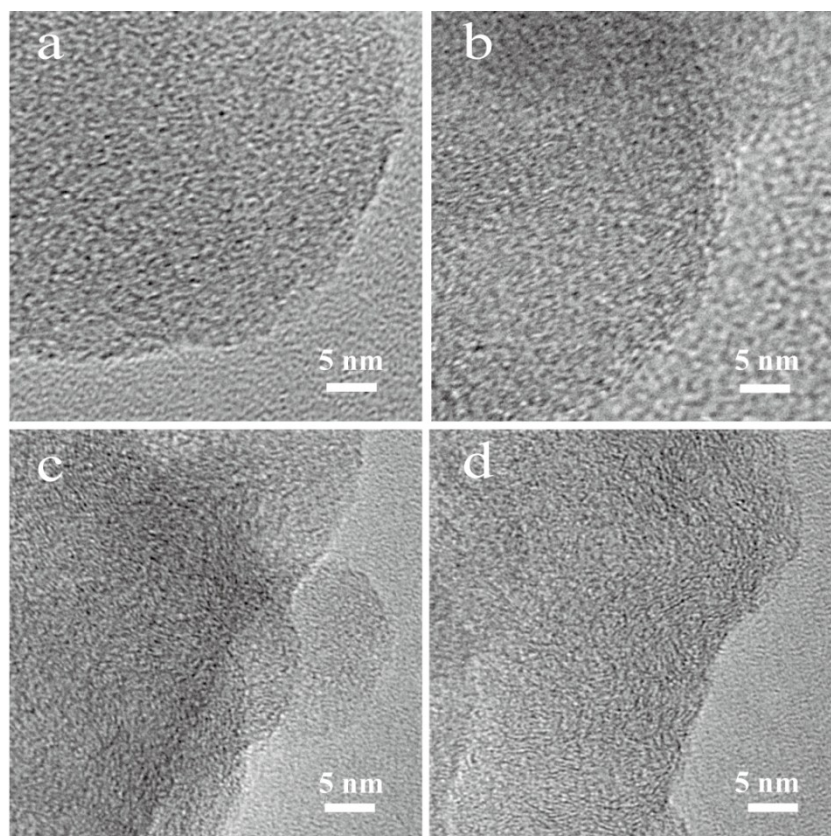

**Fig. S4** High resolution TEM images of Ta-NCa<sub>650</sub> (a), Ta-NCa<sub>750</sub> (b), Ta-NCa<sub>850</sub> (c), Ta-NCa<sub>950</sub> (d).

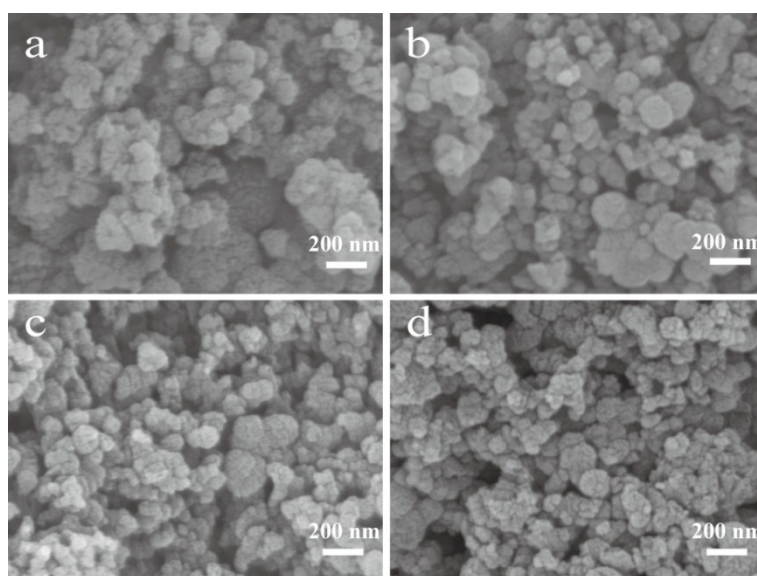

**Fig. S5** SEM images of Ta-NCa<sub>650</sub> (a), Ta-NCa<sub>750</sub> (b), Ta-NCa<sub>850</sub> (c) and Ta-NCa<sub>950</sub> (d).

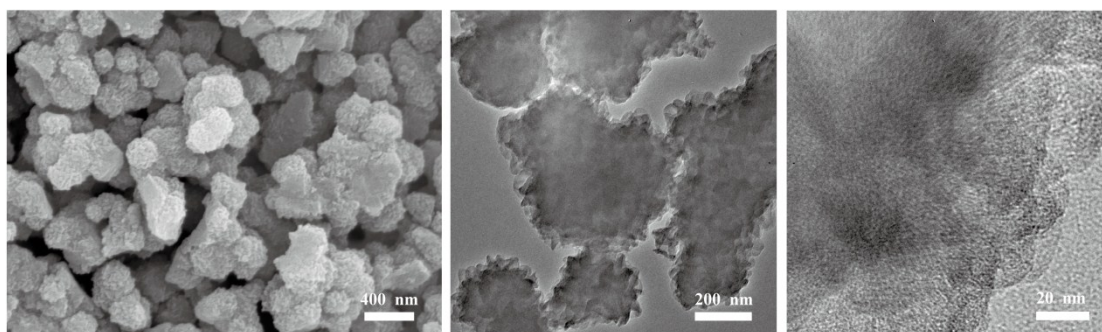

**Fig. S6** SEM image of Aa-NCa<sub>850</sub> (a), TEM image of Aa-NCa<sub>850</sub> (b), high resolution TEM image of Aa-NCa<sub>850</sub> (c).

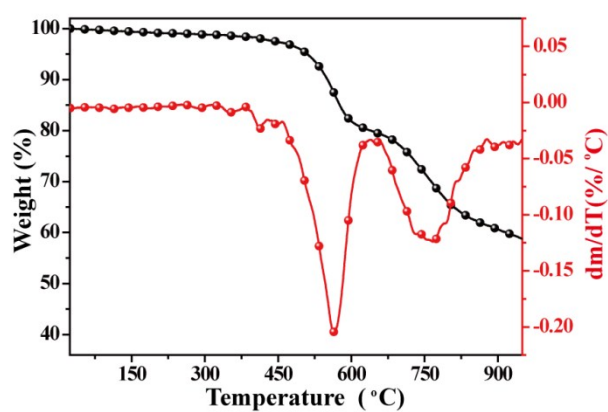

**Fig. S7** TGA and DTA curves of precursor Ta-TPA-TAA.

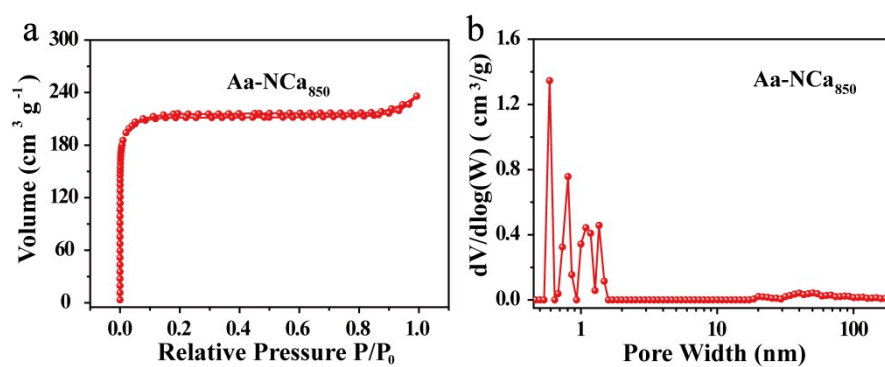

**Fig. S8** N<sub>2</sub> adsorption/desorption isotherm (a) and the DFT pore size distribution (b) of Aa-NCa<sub>850</sub>.

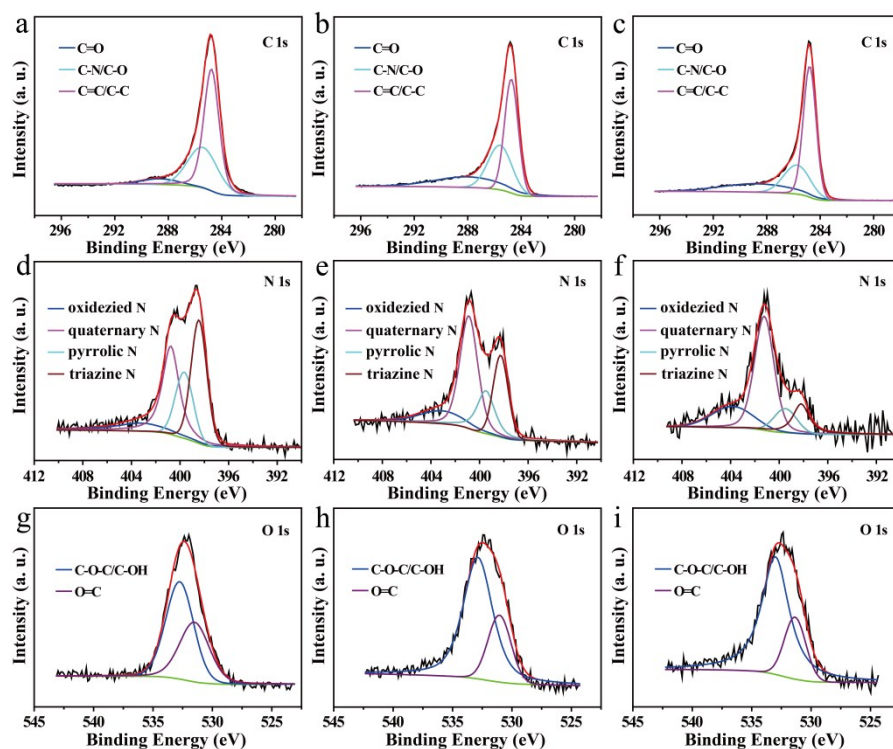

**Fig. S9** High-resolution XPS spectra. Ta-NCa<sub>650</sub>: of C 1s (a), N 1s (d) and O 1s (g) ; Ta-NCa<sub>750</sub>: C 1s (b), N 1s (e) and O 1s (h); Ta-NCa<sub>950</sub>: C 1s (c), N 1s (f) and O 1s (i).

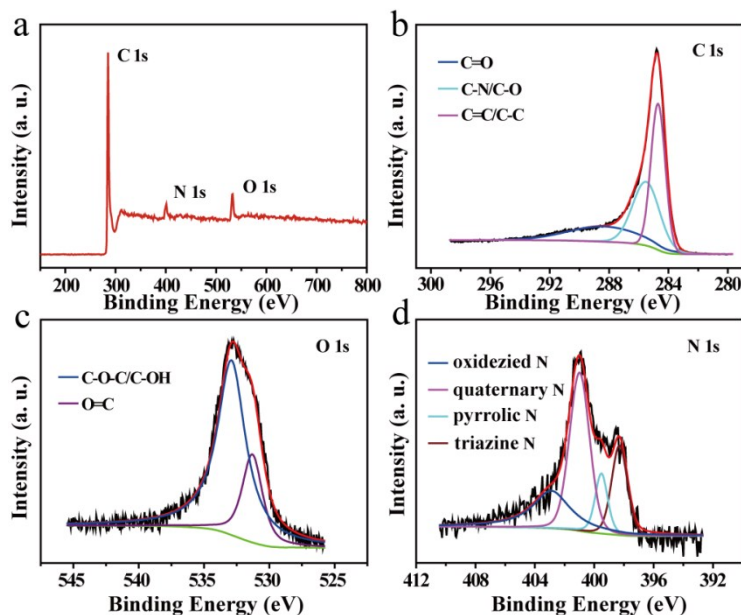

**Fig. 10** XPS survey spectrum of Aa-NCa<sub>850</sub> (a); High-resolution XPS spectra of C 1s (b), O 1s (c) and N 1s (d) for Aa-NCa<sub>850</sub>.

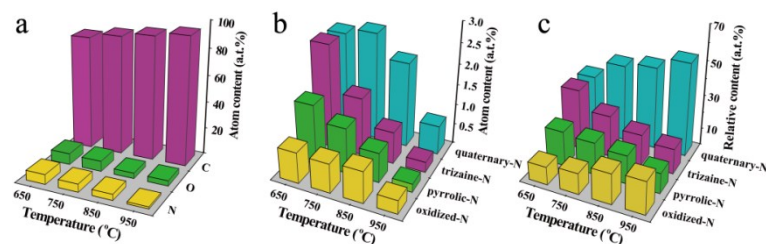

**Fig. S11** Carbon, nitrogen and oxygen contents of Ta-NiCa<sub>650</sub>, Ta-NiCa<sub>750</sub>, Ta-NiCa<sub>850</sub> and Ta-NiCa<sub>950</sub> (a); The absolute content variations of oxidized N, graphitic N, pyrrolic N, and triazine N in Ta-NiCa<sub>650</sub>, Ta-NiCa<sub>750</sub>, Ta-NiCa<sub>850</sub> and Ta-NiCa<sub>950</sub> (b); The relative content variations of oxidized N, graphitic N, pyrrolic N, and triazine N in Ta-NiCa<sub>650</sub>, Ta-NiCa<sub>750</sub>, Ta-NiCa<sub>850</sub> and Ta-NiCa<sub>950</sub> (c).

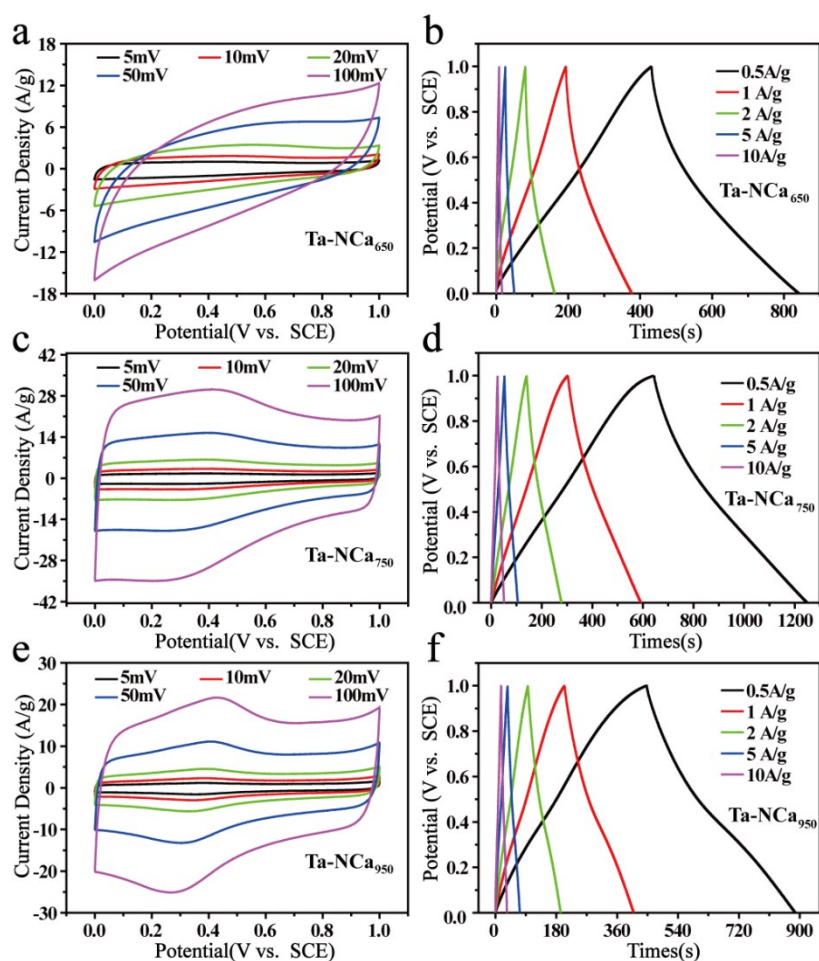

**Fig. S12** Electrochemical performances of Ta-NiCa<sub>650</sub>, Ta-NiCa<sub>750</sub> and Ta-NiCa<sub>950</sub> in 1 M H<sub>2</sub>SO<sub>4</sub>. CV curves of Ta-NiCa<sub>650</sub>, Ta-NiCa<sub>750</sub> and Ta-NiCa<sub>950</sub> (e) at the scan rates from 5 to 100 mV s<sup>-1</sup>; Galvanostatic charge discharge profiles of Ta-NiCa<sub>650</sub>, Ta-NiCa<sub>750</sub> and Ta-NiCa<sub>950</sub> (f) at the current densities from 0.5 to 10 A g<sup>-1</sup>.

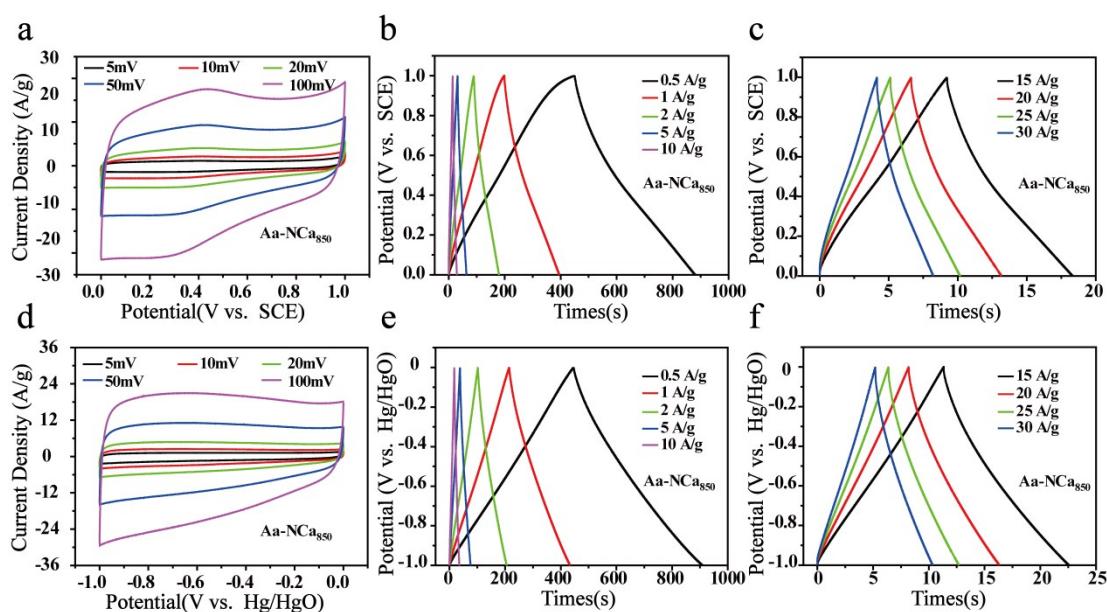

**Fig. 13** CV curves of Aa-NCa<sub>850</sub> at the scan rates from 5 to 100 mV s<sup>-1</sup> in 1 M H<sub>2</sub>SO<sub>4</sub> (a); Galvanostatic charge discharge profiles of Aa-NCa<sub>850</sub> at the current densities from 0.5 to 30 A g<sup>-1</sup> in 1 M H<sub>2</sub>SO<sub>4</sub> (b and c); CV curves of Aa-NCa<sub>850</sub> at the scan rates from 5 to 100 mV s<sup>-1</sup> in 6 M KOH (d); Galvanostatic charge discharge profiles of Aa-NCa<sub>850</sub> at the current densities from 0.5 to 30 A g<sup>-1</sup> in 6 M KOH (e and f).

CV curves of Aa-NCa<sub>850</sub> display a quasi-rectangular shape and the CV curves keep almost unchanged with the increase of the scan rates from 5 to 100 mV s<sup>-1</sup>. At a high current of 30 A g<sup>-1</sup>, Ta-NCas have specific capacitances of 123 F g<sup>-1</sup> in H<sub>2</sub>SO<sub>4</sub> and 156 F g<sup>-1</sup> in KOH.

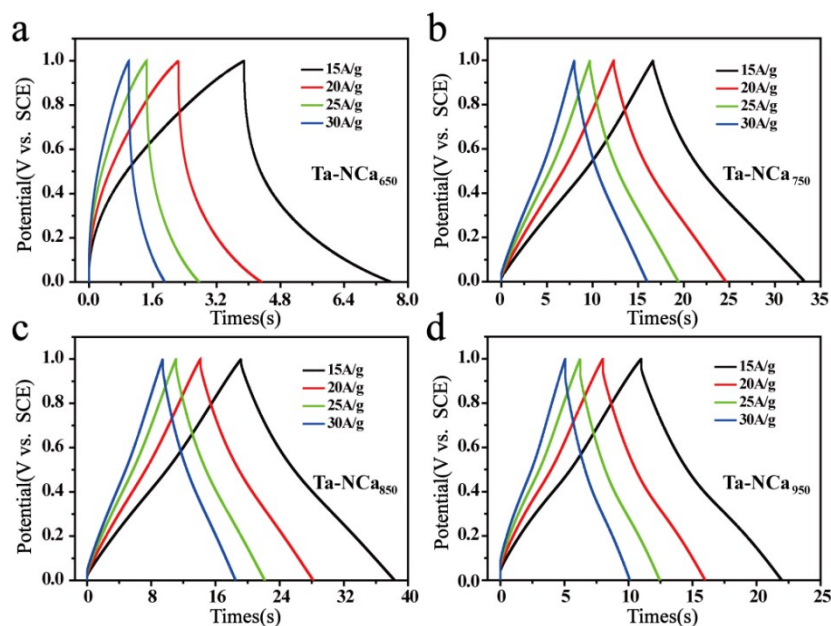

**Fig. S14** Galvanostatic charge discharge profiles of Ta-NiCa<sub>650</sub> (a), Ta-NiCa<sub>750</sub> (b), Ta-NiCa<sub>850</sub> (c) and Ta-NiCa<sub>950</sub> (d) at the current densities from 15 to 30 A g<sup>-1</sup> in 1 M H<sub>2</sub>SO<sub>4</sub>.

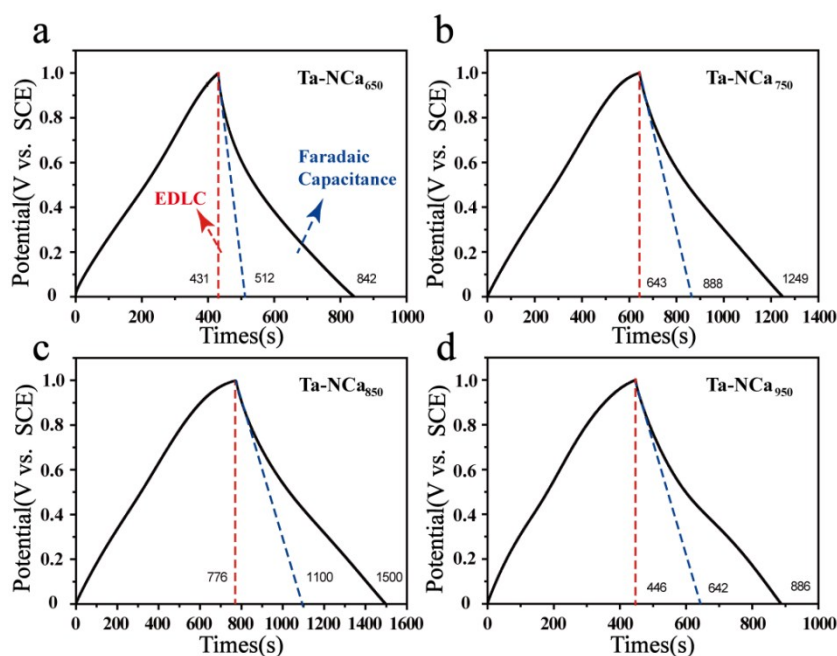

**Fig. S15** Galvanostatic charge discharge profiles of Ta-NiCa<sub>650</sub> (a), Ta-NiCa<sub>750</sub> (b), Ta-NiCa<sub>850</sub> (c) and Ta-NiCa<sub>950</sub> (d) at 0.5 A g<sup>-1</sup> in 1 M H<sub>2</sub>SO<sub>4</sub> with the estimated EDLC and faradaic capacitance contributions being obtained from the discharge portions of differing slope.

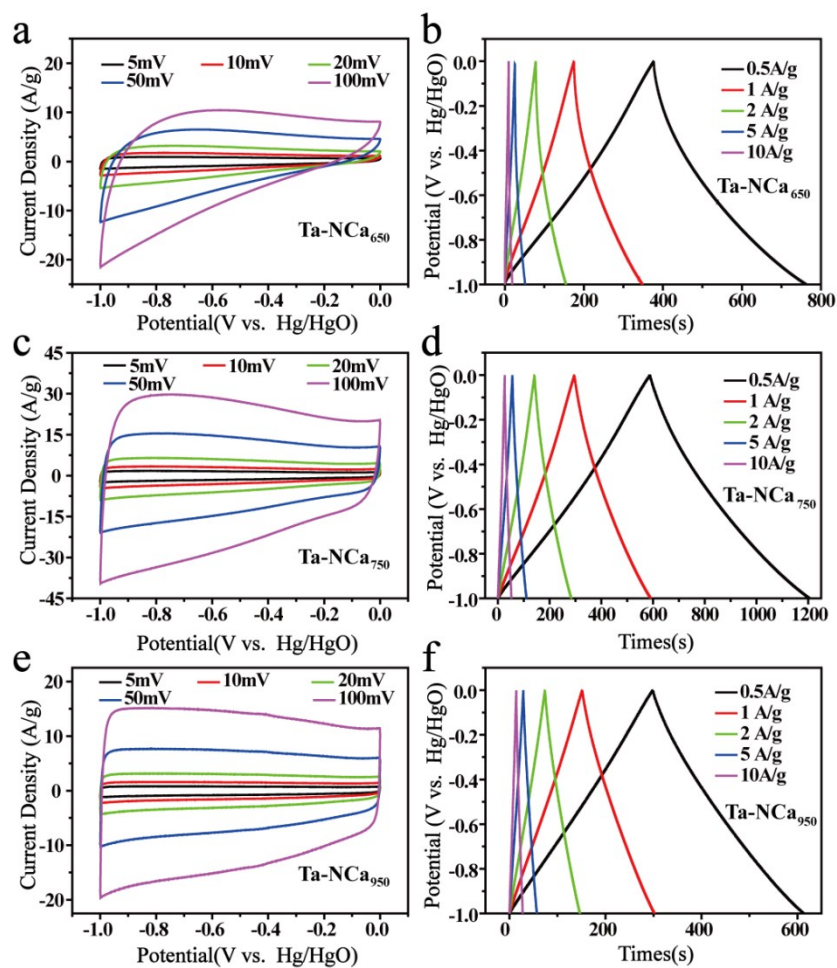

**Fig. S16** Electrochemical performances of Ta-NiCa<sub>650</sub>, Ta-NiCa<sub>750</sub> and Ta-NiCa<sub>950</sub> in 6 M KOH. CV curves of Ta-NiCa<sub>650</sub> (a), Ta-NiCa<sub>750</sub> (c) and Ta-NiCa<sub>950</sub> (e) at the scan rates from 5 to 100 mV s<sup>-1</sup>; Galvanostatic charge discharge profiles of Ta-NiCa<sub>650</sub> (b), Ta-NiCa<sub>750</sub> (d) and Ta-NiCa<sub>950</sub> (f) at the current density from 0.5 to 10 A g<sup>-1</sup>.

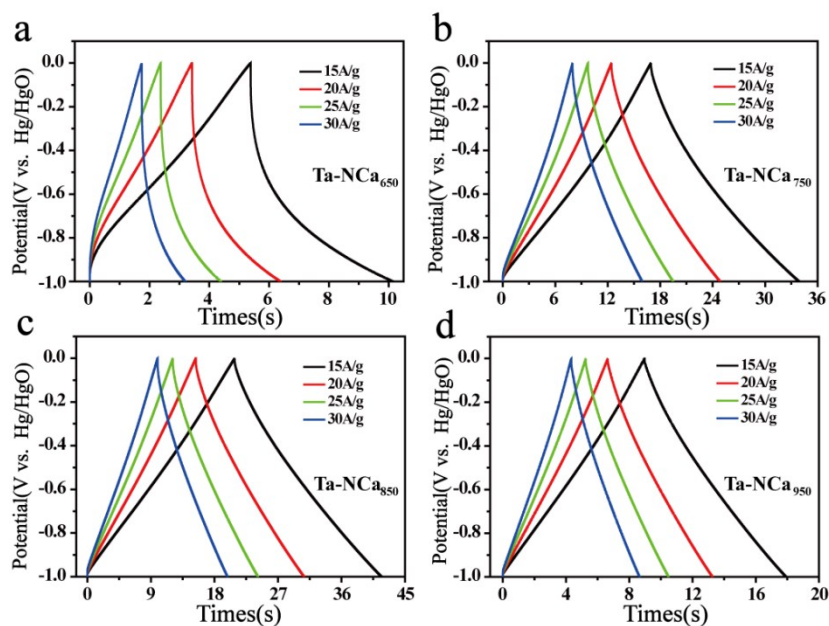

**Fig. S17** Galvanostatic charge discharge profiles of Ta-NiCa<sub>650</sub> (a), Ta-NiCa<sub>750</sub> (b), Ta-NiCa<sub>850</sub> (c) and Ta-NiCa<sub>950</sub> (d) at the current densities from 15 to 30 A g<sup>-1</sup> in 6 M KOH.

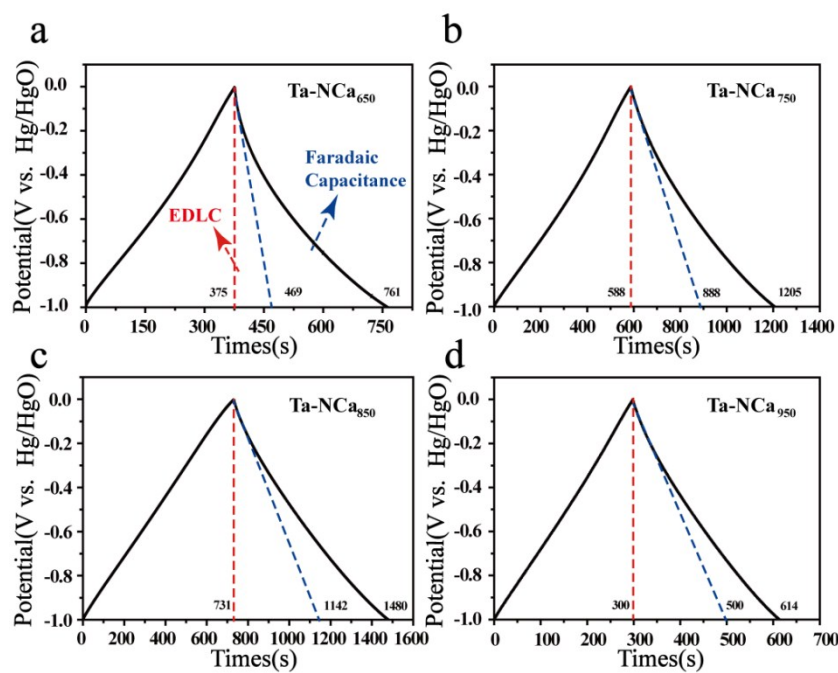

**Fig. S18** Galvanostatic charge discharge profiles of Ta-NiCa<sub>650</sub> (a), Ta-NiCa<sub>750</sub> (b), Ta-NiCa<sub>850</sub> (c) and Ta-NiCa<sub>950</sub> (d) at 0.5 A g<sup>-1</sup> in 6 M KOH with the estimated EDLC and faradaic capacitance contributions being obtained from the discharge portions of differing slope.

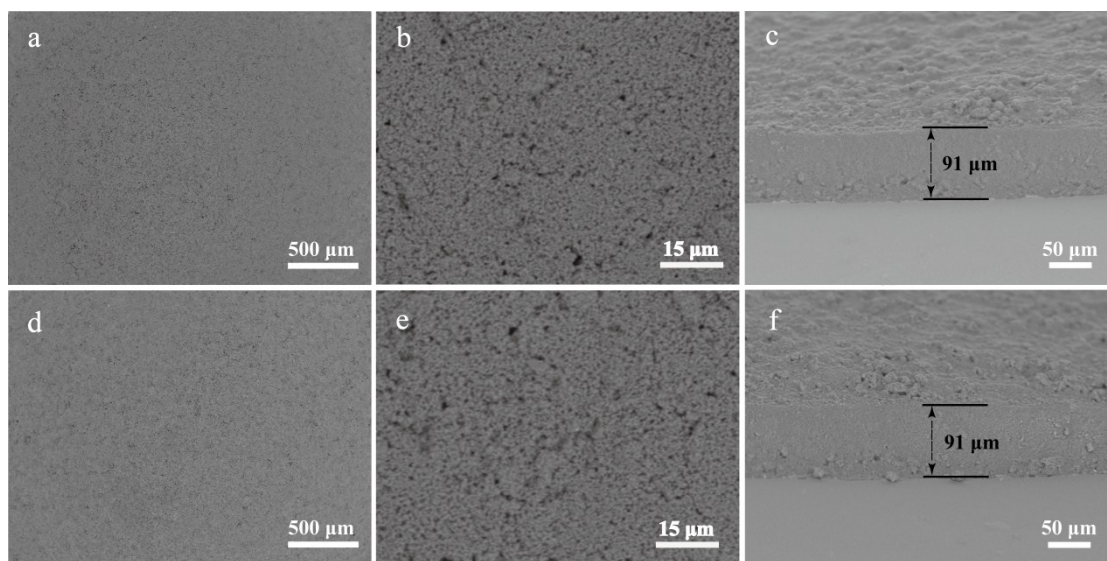

**Fig. S19** SEM images of the working electrode film: surface (a, b) and cross section (c) before 5000 cycles, surface (d, e) and cross section (f) after 5000 cycles.

The thickness of the working electrode film is about 91  $\mu\text{m}$ . No obvious morphology or thickness change can be observed to the working electrode film after 5000 cycles.

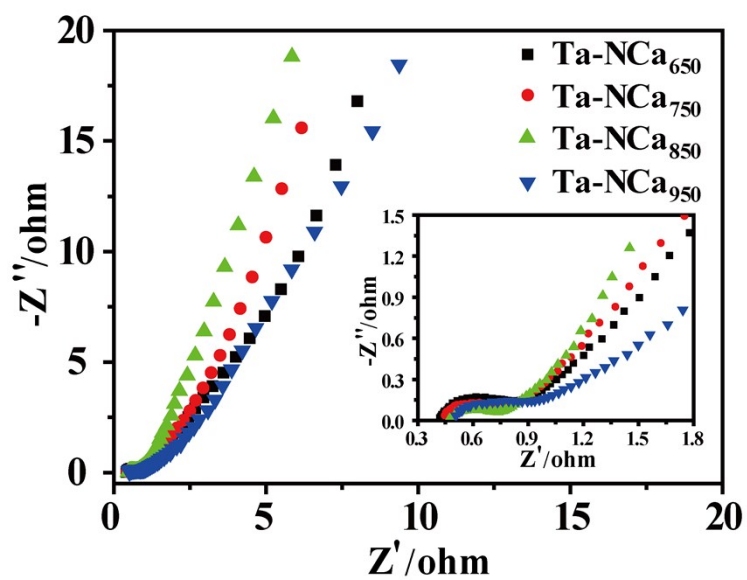

**Fig. S20** Nyquist plots of Ta-NCAs, The inset is magnified higher frequency region.

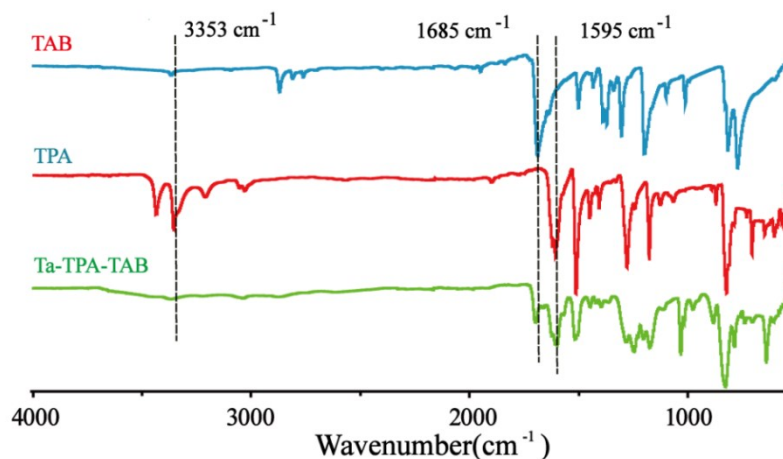

**Fig. S21** FT-IR spectra of TPA, TAB, Ta-TPA-TAB.

In the FT-IR spectrum of Ta-TPA-TAB, characteristic peak at  $\sim 3320\text{ cm}^{-1}$  derived from N-H as well as the peak at  $1686\text{ cm}^{-1}$  derived from C=O attenuates greatly, while absorption peak at  $1578\text{ cm}^{-1}$  (C=N) appears, providing strong evidence for the successful synthesis of Schiff-base polymer Ta-TPA-TAB.

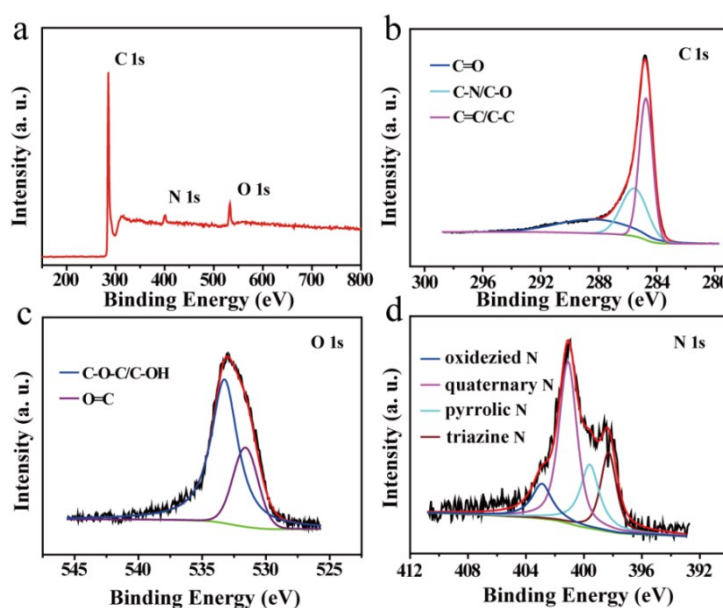

**Fig. S22** XPS survey spectrum of Ta-NCb<sub>850</sub> (a); high-resolution XPS spectra of C 1s (b), O 1s (c) and N 1s (d) for Ta-NCb<sub>850</sub>.

The XPS spectra of Ta-NCb<sub>850</sub> is similar to that of Ta-NCa<sub>850</sub> (Figure 3a-d) and corresponding analysis is described in the main text.

**Table S1** surface elemental composition (atomic %) of TAA, TPA and Ta-TPA-TAA.

| Samples    | Composition (a.t. %) |       |       |
|------------|----------------------|-------|-------|
|            | C                    | N     | O     |
| TAA        | 75.35                | 24.65 | 0     |
| TPA        | 74.97                | 0     | 25.03 |
| Ta-TPA-TAA | 76.50                | 14.32 | 9.18  |

**Table S2** Surface area, porosity, surface elemental composition (atomic %) of samples.

|                       | $S_{\text{BET}}^{\text{a}}$ | $S_{\text{micro}}^{\text{b}}$ | $V_{\text{total}}^{\text{c}}$ | Composition (a.t. %) <sup>d</sup> |      |      |
|-----------------------|-----------------------------|-------------------------------|-------------------------------|-----------------------------------|------|------|
|                       | $\text{m}^2 \text{g}^{-1}$  | $\text{m}^2 \text{g}^{-1}$    | $\text{cm}^3 \text{g}^{-1}$   | C                                 | N    | O    |
| Ta-NCa <sub>650</sub> | 373                         | 332                           | 0.24                          | 84.50                             | 7.26 | 8.24 |
| Ta-NCa <sub>750</sub> | 440                         | 414                           | 0.29                          | 88.45                             | 5.90 | 7.64 |
| Ta-NCa <sub>850</sub> | 706                         | 654                           | 0.44                          | 91.59                             | 4.39 | 4.02 |
| Ta-NCa <sub>950</sub> | 950                         | 802                           | 0.54                          | 94.67                             | 1.51 | 3.82 |
| Aa-NCa <sub>850</sub> | 722                         | 715                           | 0.40                          | 91.07                             | 3.85 | 5.08 |
| Ta-NCb <sub>850</sub> | 896                         | 775                           | 0.51                          | 90.9                              | 3.74 | 5.36 |

<sup>a</sup> Specific surface area obtained from BET. <sup>b</sup> Surface area of micropores calculated by the t-plot method. <sup>c</sup> Total pore volume. <sup>d</sup> Atomic percent of elements obtained from XPS analysis.

**Table S3** Heteroatoms doped carbons as electrode materials of supercapacitors.

| Electrode Materials   | Electrolyte                        | Capacitance (F g <sup>-1</sup> ) | Current Density        | Ref.      |
|-----------------------|------------------------------------|----------------------------------|------------------------|-----------|
| Ta-NCa <sub>850</sub> | 6 M KOH                            | 374.5                            | 0.5 A g <sup>-1</sup>  | This work |
|                       | 1 M H <sub>2</sub> SO <sub>4</sub> | 362                              | 0.5 A g <sup>-1</sup>  |           |
| TCNQ-CTF-800          | 1 M KOH                            | 383                              | 0.2 A g <sup>-1</sup>  | 5         |
| PMC-650               | 1 M H <sub>2</sub> SO <sub>4</sub> | 312                              | 0.5 A g <sup>-1</sup>  | 6         |
| HFAC-2                | 1 M KOH                            | 525                              | 0.25 A g <sup>-1</sup> | 7         |
|                       | 1 M H <sub>2</sub> SO <sub>4</sub> | 556                              | 0.25 A g <sup>-1</sup> |           |
| ABF-9%M               | 6 M KOH                            | 289                              | 0.5 A g <sup>-1</sup>  | 11        |
| TNNs-550              | 1 M H <sub>2</sub> SO <sub>4</sub> | 298                              | 0.2 A g <sup>-1</sup>  | 13        |
| N-MCS-200             | 6 M KOH                            | 292                              | 1 A g <sup>-1</sup>    | 28        |
| aNMC-0.5              | 1 M H <sub>2</sub> SO <sub>4</sub> | 328                              | 0.5 A g <sup>-1</sup>  | 33        |
| TC                    | 6 M KOH                            | 286.6                            | 0.5 A g <sup>-1</sup>  | 34        |
| N/S-HCS               | 6 M KOH                            | 280                              | 1 A g <sup>-1</sup>    | 35        |
| G/CNTs-200            | 6 M KOH                            | 202                              | 0.5 A g <sup>-1</sup>  | 46        |
